# Systematic Review of Anastomotic Leakage Rate According to an International Grading System Following Anterior Resection for Rectal Cancer

Zhi-Jie Cong<sup>1,2</sup>, Liang-Hao Hu<sup>2</sup>, Zheng-Qian Bian<sup>1</sup>, Guang-Yao Ye<sup>1</sup>, Min-Hao Yu<sup>1</sup>, Yun-He Gao<sup>1</sup>, Zhao-Shen Li<sup>2</sup>, En-Da Yu<sup>2\*</sup>, Ming Zhong<sup>1\*</sup>

**1** Department of Colorectal Surgery, Ren Ji Hospital, School of Medicine, Shanghai Jiao Tong University, Shanghai, China, **2** Digestive Endoscopy Center, Changhai Hospital, Second Military Medical University, Shanghai, China

## Abstract

**Background:** A generally acceptable definition and a severity grading system for anastomotic leakages (ALs) following rectal resection were not available until 2010, when the International Study Group of Rectal Cancer (ISGRC) proposed a definition and a grading system for AL.

**Methods:** A search for published data was performed using the MEDLINE database (2000 to December 5, 2012) to perform a systematic review of the studies that described AL, grade AL according to the grading system, pool data, and determine the average rate of AL for each grade after anterior resection (AR) for rectal cancer.

**Results:** A total of 930 abstracts were retrieved; 40 articles on AR, 25 articles on low AR (LAR), and 5 articles on ultralow AR (ULAR) were included in the review and analysis. The pooled overall AL rate of AR was 8.58% (2,085/24,288); the rate of the asymptomatic leakage (Grade A) was 2.57%, that of AL that required active intervention without relaparotomy (Grade B) was 2.37%, and that of AL that required relaparotomy (Grade C) was 5.40%. The pooled rate of AL that required relaparotomy was higher in AR (5.40%) than in LAR (4.70%) and in ULAR (1.81%), which could be attributed to the higher rate of protective defunctioning stoma in LAR (40.72%) and ULAR (63.44%) compared with that in AR (30.11%).

**Conclusions:** The new grading system is simple that the ALs of each grade can be easily extracted from past publications, therefore likely to be accepted and applied in future studies.

**Citation:** Cong Z-J, Hu L-H, Bian Z-Q, Ye G-Y, Yu M-H, et al. (2013) Systematic Review of Anastomotic Leakage Rate According to an International Grading System Following Anterior Resection for Rectal Cancer. PLoS ONE 8(9): e75519. doi:10.1371/journal.pone.0075519

**Editor:** Georgina L Hold, University of Aberdeen, United Kingdom

**Received:** May 25, 2013; **Accepted:** August 13, 2013; **Published:** September 25, 2013

**Copyright:** © 2013 Cong et al. This is an open-access article distributed under the terms of the Creative Commons Attribution License, which permits unrestricted use, distribution, and reproduction in any medium, provided the original author and source are credited.

**Funding:** No outside financial support was received for this study.

**Competing interests:** The authors have declared that no competing interests exist.

\* E-mail: drzhongm@126.com (MZ); dryuenda@gmail.com (EY)

☉ These authors contributed equally to this work.

## Introduction

Anastomotic leakage (AL) is the commonest major complication after rectal cancer surgery and can result in the need for additional surgery, prolonged hospital stays, increased morbidity and mortality and possibly a poorer oncological prognosis [1]. AL occurred in 1% to 21% of individuals with anterior resection (AR) for rectal cancer, as reported in several clinical trials [2-4]. However, the reported rate of AL varies worldwide. This variation can in part be attributed to the lack of a generally acceptable definition and grading of the severity of AL until 2010. This definition and grading system for AL was proposed by the International Study Group of Rectal Cancer (ISGRC) [5]. This system has since been used by some groups

to describe AL in the current literature [6,7]. Our study aims to review systematically the studies that describe AL, grade AL according to the grading system proposed by ISGRC. We will then pool the data and determine the average rate of AL for each grade after AR for rectal cancer surgery. Given the impact that total mesorectal excision and stapling devices have had on AL, only studies using these techniques after the year 2000 will be included in this review. In the absence of evidence based on prospective trials of grading AL, this pooled systematic analysis could underpin the current evidence base and thus provide relatively definitive information on this common and potentially life threatening complication.

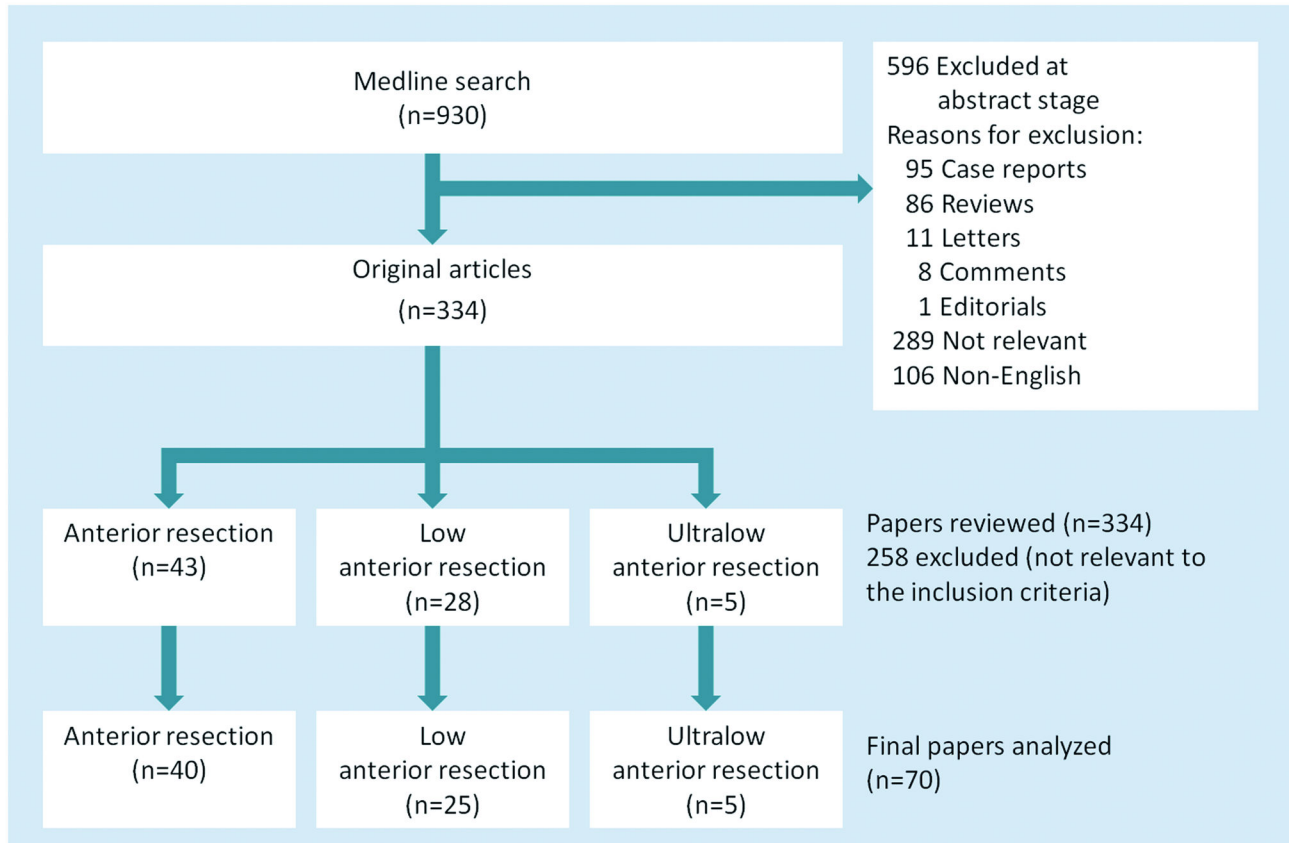

**Figure 1. Literature search, review, and analysis.**

doi: 10.1371/journal.pone.0075519.g001

## Methods

### Definition and severity grading of AL

ISGRC defined AL as a defect in the intestinal wall integrity at the colorectal or coloanal anastomotic site (including suture and staple lines of neorectal reservoirs), which leads to communication between the intra- and extraluminal compartments. A pelvic abscess close to the anastomosis is also considered as AL. The group suggested grading the severity of AL based on its effect on the patients' clinical management. Grade A was defined as a leakage that requires no active therapeutic intervention. Grade B was defined as a leakage that requires active therapeutic intervention but can be managed without relaparotomy. Grade C was defined as a leakage that requires relaparotomy [5].

### Literature search and selection strategy

Relevant studies published between January 2000 and December 2012 were identified from the search of the Medline databases. The following search terms were used: (rectum OR rectal OR proctectomy) AND (leakage OR failure OR integrity OR insufficiency OR breakdown OR defect OR separation OR dehiscence). Additional relevant articles were then obtained

using the citations in the publications identified by the initial search.

Publications in English language that met the following inclusion criteria—either (i, ii, and iii) or (i, ii, and iv)—were selected: (i) availability of laparotomic or laparoscopic sphincter-saving resection for rectal cancer; (ii) availability of data and an incidence rate of AL; (iii) subsequent management of AL, including conservative treatment or relaparotomy reported; and (iv) data on patients with routine imaging studies such as contrast enema after the initial operation or before the DS was closed.

Studies that considered preoperative chemoradiation therapy as the study object were excluded from the analysis, as well as those that used experimental surgical techniques such as single-access laparoscopic or robot-assisted surgery. Two authors (C.ZJ, and H.LH) independently reviewed each of the included studies and extracted data from them. Any discrepancies were resolved by discussion. To increase the sensitivity of the search strategy, the reference lists of the retrieved literature were cross searched manually for additional relevant publications.

### Data extraction and analysis strategy

We used the number of ALs based on their definition in the studies. Patients with AL were divided into three grades

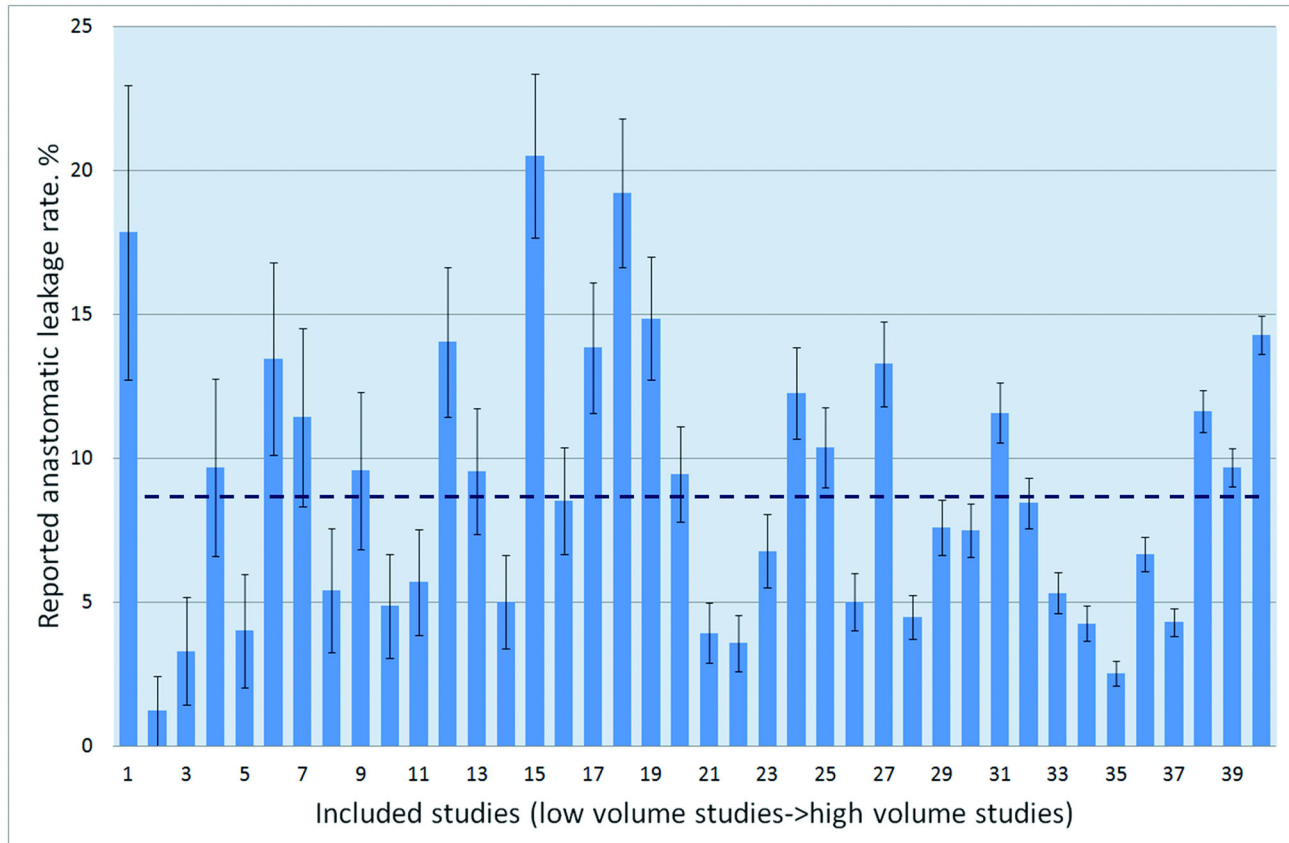

**Figure 2. AL rates reported by the included studies on AR ranked by volume.**

doi: 10.1371/journal.pone.0075519.g002

according to the definition of the grading proposed by ISGRC. The selected studies were divided into three groups: AR, low AR (LAR), and ultralow AR (ULAR). Because the studies on AR are the most common and representative in the current literature, which also include patients with LAR and ULAR, we chose the AR studies as the main part for the analysis and discussion in our research. The pooled rates for each grade of AL extracted from the studies on AR were presented. Then, the data from AR were compared with the data from LAR and ULAR. The data of the AR studies from different countries were also compared. When available, the rate of defunctioning ileostomy/colostomy was also extracted from the studies for comparison.

### Statistical analysis

Statistical analysis of the relative frequencies was conducted with the chi-squared test using the Statistical Package for Windows, version 13.0 (SPSS, Chicago, Illinois, USA). A two-sided *P* value of  $<0.05$  was considered as statistically significant.

## Results

### Bibliometrics

A total of 930 abstracts were retrieved from Medline from 2000 to December 5, 2012. Among these, 106 non-English articles and 289 non-relevant English articles with no or minimal association with AL were excluded. Some additional 201 articles were excluded after further examination of the downloaded abstracts based on the criteria shown in Figure 1. Thus, 334 full papers were examined. Among these, 258 were rejected as irrelevant, which left 43 studies on AR, 28 studies on LAR, and 5 studies on ULAR. Further review of the full papers revealed that three studies on AR patients [8-10] and one study on LAR patients [11] were conducted in the same hospital and duplicated the time of the patients in the other four studies; two other studies did not provide a conclusion whether their patients all underwent LAR [12,13]. Thus, the final analysis included 70 studies: 40 on AR patients [2-4,6,14-49], 25 on LAR patients [7, 50-73], and 5 on ULAR patients with AL [74-78] (Figure 1).

### Pooled rate of AL for each grade in patients with AR

**Incidence of reported AL.** A total of 40 studies that addressed the rate of AL after AR were analyzed. Four

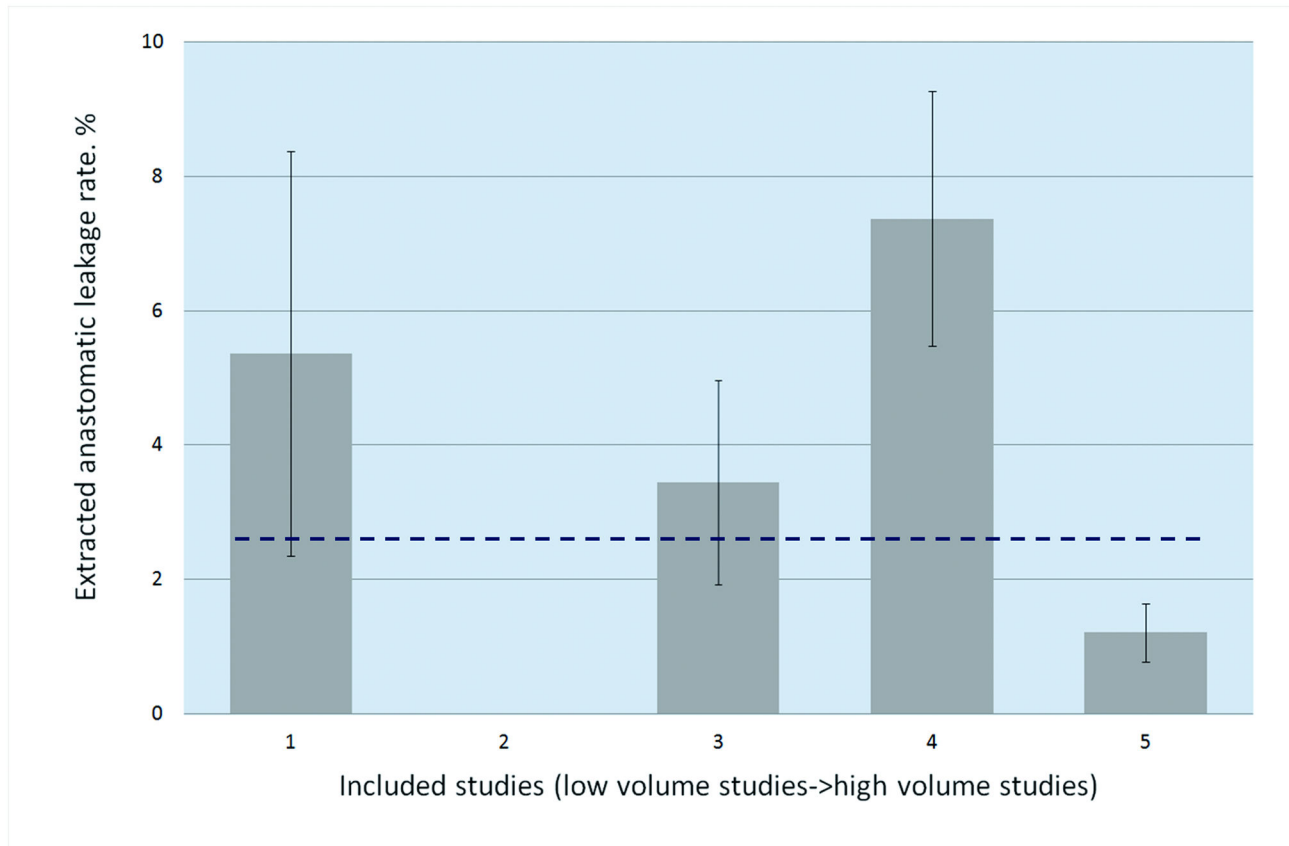

**Figure 3. Extracted rates of Grade A leakage ranked by volume.**

doi: 10.1371/journal.pone.0075519.g003

randomized controlled trials were performed, and the numbers of non-randomized prospective and retrospective clinical trials were 13 and 23, respectively. The included studies had a total population of 24,288 patients. The sample sizes of the studies varied from 56 to 2,729 patients.

AL was described in 32 of the 40 (80%) studies. Twenty-seven studies provided a detailed description of the definition of AL, most of which consisted of a clinical suspicion based on the patient's clinical symptoms, which were subsequently confirmed by endoscopy or imaging studies. Only one author described AL according to the definition proposed by ISGRC [6]. The remaining five studies provided only a limited description.

In the 40 studies, the number of patients confirmed to have anastomotic leaks ranged from 1 to 390, with a total of 2,085. The pooled overall rate of AL was 8.58%. A large variation in the AL rates was observed in the studies; the highest reported AL rate was 20.50%, whereas the lowest was 1.22% (Figure 2).

**Incidence of Grade A leakage.** Grade A AL was defined as an "asymptomatic/radiologic leakage," which was usually not considered as the object of the study by almost all authors because it required no change in the patient management. Only five studies [3,31,39,45,49] reported that imaging studies such as contrast enema were routinely performed after the

initial operation or before the stoma revision to detect a radiological AL, where we obtained the number of events with Grade A leakage. Since the guideline of routine imaging after rectal resection was not available, the timing of imaging among studies was different from each other. So we didn't give a pooled data of the timing of imaging in this systematic review. The studies showed that 30 out of 1,167 patients with routine imaging studies had a Grade A leakage, and the pooled rate was 2.57%, which varied from 0% to 7.37% (Figure 3).

**Incidence of Grade B leakage.** Based on non-surgical interventions (such as antibiotics) or interventional drainage or transanal lavage described in 33 studies, we extracted the rates of Grade B leakage in these studies. A total of 442 out of 18,647 patients had subsequent Grade B leakage after AR for rectal cancer. The pooled incidence rate of the Grade B leakage was 2.37%, which varied from 0% to 8.99% (Figure 4).

**Incidence of Grade C leakage.** The number of Grade C leakage was extracted from 39 studies. A total of 1,309 Grade C leakage cases were confirmed in this review, which means that 63.08% (1,309/2,075) of the reported ALs after AR for rectal cancer required operative re-intervention. The pooled incidence rate of Grade C leakage was 5.40% (1,309/24,232); the highest was 11.97%, and the lowest was 0% (Figure 5). Twenty-three authors reported surgical procedure of re-intervention for Grade C leakage in their studies. A total of 536

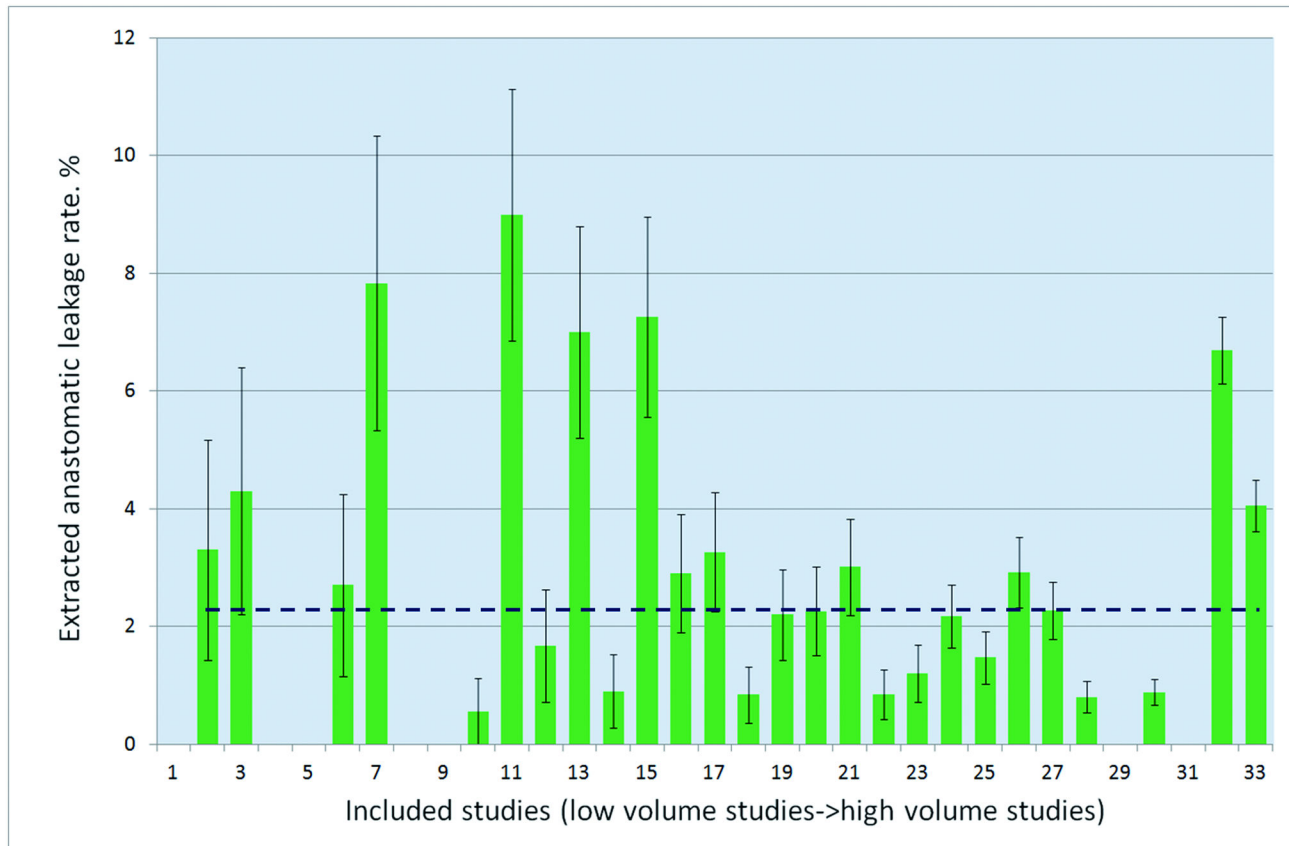

**Figure 4. Extracted rates of Grade B leakage ranked by volume.**

doi: 10.1371/journal.pone.0075519.g004

Grade C leakage cases were found in these specific studies, and 480 (89.55%) needed temporary or permanent diverting-stoma construction.

#### AL in patients with LAR and ULAR compared with AR

The ALs reported in the studies on LAR and ULAR were also reviewed. Twenty-five studies on LAR matched the inclusion criteria, which had a total population of 4,664 patients. The LAR definition was described in 11 of 25 (44%) studies. Most of the description of the definition consisted of the level of anastomosis or tumor margin, which should be below the peritoneal reflection or from lower than 6 cm to 8 cm from the anal verge. A total of 414 leaks were confirmed; the pooled overall rate of AL was 8.88% (which ranged from 1.89% to 20.59%). The pooled rates of Grades A, B, and C leakages were 1.14% (8/701 from 3 studies), 3.75% (151/4,022 from 22 studies), and 4.70% (219/4,664 from all 25 studies), respectively.

Five studies on ULAR matched the inclusion criteria, which had a total population of 551 patients. ULAR was described as intersphincteric resection or resection in the ultralow rectal cancer in these studies. A total of 41 leaks were confirmed; the pooled overall rate of AL was 7.44% (which ranged from 4.65% to 12.50%). The pooled rates of Grades A, B, and C leakages

were 7.41% (2/27 from one study), 5.26% (29/551 from all five studies), and 1.81% (10/551 from all five studies), respectively.

The pooled overall rates of AL in AR and LAR were similar (8.58% versus 8.88%) and were both a little higher than that in ULAR (7.41%). The pooled rates of AL for each grade in AR, LAR, and ULAR are shown in Figure 6. Unfortunately, only very few studies (only nine studies in all the three groups) provided data for the Grade A leakage; thus, we could not make a substantial analysis of the trend of AL in the three groups from the few available data. However, the data for Grades B and C were sufficient to be credible. The pooled rate of Grade C leakage in the AR studies was the highest (AR > LAR > ULAR). On the other hand, the pooled rate of Grade B was the lowest in AR (AR < LAR < ULAR).

The data of the temporary DS in the initial operation were also extracted and compared. The pooled rates of DS in the 29 AR studies, 21 LAR studies, and 4 ULAR studies were 30.11% (6,024/20,006), 40.72% (1,643/4,035), and 63.44% (295/465), respectively. The three results (AR < LAR < ULAR) also showed the same trend as that of the Grade B leakage and an opposite trend with that of the Grade C leakage.

**Table 1.** Pooled rate of AL for each grade after AR in different countries.

| Country(n*)    | AL        |      |             |      |             |       |               |       |
|----------------|-----------|------|-------------|------|-------------|-------|---------------|-------|
|                | Grade A   |      | Grade B     |      | Grade C     |       | Total         |       |
|                | Count     | %    | Count       | %    | Count       | %     | Count         | %     |
| <b>Asia</b>    |           |      |             |      |             |       |               |       |
| China(4)       | N/A       | N/A  | 36<br>(4)   | 1.76 | 90<br>(4)   | 4.40  | 126<br>(4)    | 6.16  |
| Hong Kong(1)   | N/A       | N/A  | 3 (1)       | 3.30 | 0 (1)       | 0     | 3 (1)         | 3.30  |
| Japan(5)       | N/A       | N/A  | 14<br>(4)   | 1.90 | 51<br>(5)   | 2.95  | 113<br>(5)    | 6.53  |
| Korea(7)       | N/A       | N/A  | 19<br>(7)   | 0.42 | 197<br>(7)  | 4.34  | 216<br>(7)    | 4.76  |
| Taiwan(1)      | N/A       | N/A  | N/A         | N/A  | 37<br>(1)   | 3.70  | 53 (1)        | 5.31  |
| Total(18)      | N/A       | N/A  | 72<br>(16)  | 0.97 | 375<br>(18) | 3.99% | 511<br>(18)   | 5.43  |
| <b>Europe</b>  |           |      |             |      |             |       |               |       |
| Austria(1)     | N/A       | N/A  | 4 (1)       | 0.85 | 45<br>(1)   | 9.53  | 49 (1)        | 10.38 |
| Belgium(1)     | N/A       | N/A  | 16<br>(1)   | 0.88 | 105<br>(1)  | 5.79  | 121<br>(1)    | 6.67  |
| France(2)      | 19<br>(2) | 5.67 | 30<br>(2)   | 7.94 | 17<br>(2)   | 4.50  | 66 (2)        | 17.46 |
| Germany(6)     | N/A       | N/A  | 34<br>(3)   | 2.39 | 343<br>(6)  | 6.99  | 606<br>(6)    | 12.35 |
| Greece(1)      | N/A       | N/A  | 4 (1)       | 4.30 | 5 (1)       | 5.38  | 9 (1)         | 9.68  |
| Italy(2)       | 0 (1)     | 0    | 9 (1)       | 7.83 | 12<br>(2)   | 5.48  | 25 (2)        | 11.42 |
| Ireland(1)     | N/A       | N/A  | 0 (1)       | 0    | 4 (1)       | 4.00  | 4 (1)         | 4.00  |
| Netherlands(2) | N/A       | N/A  | 21<br>(2)   | 1.97 | 93<br>(2)   | 8.71  | 114<br>(2)    | 10.67 |
| Norway(2)      | 3 (1)     | 5.36 | 131<br>(1)  | 6.69 | 97<br>(1)   | 4.95  | 238<br>(2)    | 11.82 |
| Sweden(3)      | N/A       | N/A  | 112<br>(3)  | 4.17 | 182<br>(3)  | 6.77  | 294<br>(3)    | 10.93 |
| Total(21)      | 22<br>(4) | 4.35 | 361<br>(16) | 3.57 | 903<br>(20) | 6.59% | 1,526<br>(21) | 11.09 |
| USA(1)         | 8 (1)     | 1.21 | 9 (1)       | 0.80 | 31<br>(1)   | 2.75  | 48 (1)        | 4.26  |

\* . number of reports

doi: 10.1371/journal.pone.0075519.t001

### Pooled rate of AL with each grade after AR in different countries

The included AR reports consisted of 18 reports from Asia [2,14-30], 21 from Europe [3, 4, 6, 31-48], and 1 from the US [49]. The pooled regional AL rates were 5.43% in Asia (511/9,406), 11.09% in Europe (1,526/13,755), and 4.26% in the US (48/1,127). The difference between the US and Asia in the overall AL rate after AR was not significant ( $P = 0.097$ ). However, the rate was significantly higher in Europe than in the US and Asia (both  $P < 0.001$ ). The same situation was true for the regional rate of Grades B and C leakages (Table 1).

## Discussion

AL has been well known as a predominant cause of morbidity and mortality after AR [33,53]. In addition, some authors also reported that leakage impaired long-term prognosis of patients with rectal cancer, in addition to the adverse effect on late functional results, particularly when operative re-intervention was required [12,68,79-81]. The administration of adjuvant chemotherapy may be prevented or delayed for the occurrence of AL in these patients, which is probably associated with poor oncological outcome. Therefore, the incidence of AL after AR was considered an essential measure to evaluate the clinical value of the different operative and perioperative interventions and, hence, is selected frequently as a primary end point in clinical trials. However, because of the lack of objective and easily applicable definitions of AL, the results among studies did not allow simple comparison and, therefore, clear conclusions as to which type of operative and perioperative management should be preferred in daily practice were hindered.

To standardize the reporting of clinical studies, ISGRC proposed a generally acceptable definition and grading of the severity for AL in 2010 [5], which have been adopted by clinicians in reporting their studies and helped readers compare the results of different reports. This definition comprised all types of leakages ranging from an asymptomatic leakage to a leakage resulting in life-threatening conditions, and the grading system was defined according to the clinical management of AL, which can be applied easily within the routine clinical care and is likely to be accepted and applied in future studies.

AL is classified as Grade A when not associated with clinical symptoms, which is commonly detected by contrast enema studies during routine diagnostic workup before the closure of a temporary ileostomy/colostomy [82]. We regret to find that Grade A leakage cases were only extracted from five reports on AR in our review. Because of the almost harmless character of this type of AL, most authors in the literature may not have required routine imaging studies, which made the radiologic AL difficult to discover. Moreover, when occasionally found by imaging, conservative treatment such as prophylactic antibiotic therapy might be needed instead of simple fasting and observation, even when no symptom is observed in the patient.

AL is classified as Grade B when the patient's clinical condition requires an active therapeutic intervention that can be managed without operative re-intervention. Patients suffer from mild to moderate distress, characterized by abdominal and/or pelvic pain and possible abdominal distension. Pelvic drains may discharge turbid/purulent or fecal fluid, although the presence of this finding depends on the size of the leakage and is alleviated in patients with DS. Moreover, patients with Grade B leakage may complain of turbid/purulent rectal or vaginal discharge.

AL is classified as Grade C when the patient is quite ill and requires operative relaparotomy. These patients usually have abdominal pain and fever and subsequently develop signs of peritonitis (tenderness to palpation, abdominal wall rigidity, and tachycardia). If operative re-intervention to control the septic source is delayed or not performed, the clinical condition of

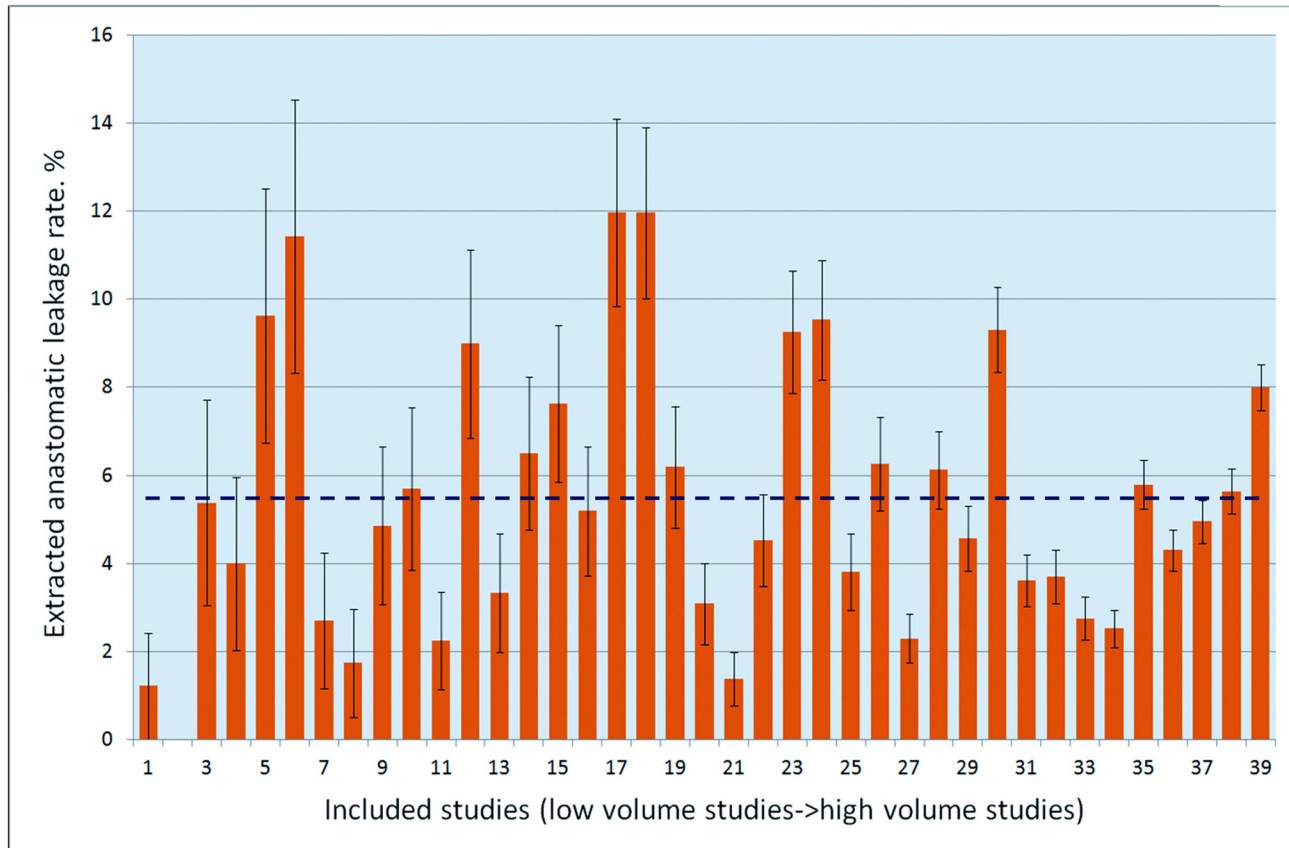

**Figure 5. Extracted rates of Grade C leakage ranked by volume.**

doi: 10.1371/journal.pone.0075519.g005

these patients could deteriorate and ultimately results in sepsis with clinical signs of hypothermia, leukopenia, and organ failure. In this thorough overview of the studies, we extracted a considerable pooled rate of 5.40% for Grade C leakage, which means that 63.08% of AL patients needed operative re-intervention. Moreover, 89.55% of these patients with Grade C leakage needed temporary or permanent diverting-stoma construction.

Interestingly, although the difference in the overall rates of AL among the reports on AR, LAR, and ULAR was not very large, an opposite trend of the pooled rate of Grades B and C leakages was observed in these three groups, as revealed in the present systematic review (Grade C rate in AR > Grade C rate in LAR > Grade C rate in ULAR and Grade B rate in AR < Grade B rate in LAR < Grade B rate in ULAR). This results means that more ALs required operative re-intervention in the reports on AR than those on LAR and ULAR. We believed that the difference in the rate of protective DS in the initial operation among the reports on AR, LAR, and ULAR could explain this interesting situation because primary DS can effectively reduce the risk of AL that requires relaparotomy, as reported by other authors [3,43,83,84]. Our findings in this review revealed the following: the pooled rate of primary DS in AR < the pooled rate of DS in LAR < the pooled rate of DS in ULAR.

The pooled rate of AL in the European countries was much higher than those in the Asian countries and the US ( $P < 0.001$ ). We cannot determine whether any ethnic or regional differences exist in the actual incidence of AL in these populations. Of course, the differences in the language background and the indications for neoadjuvant chemoradiation therapy between the European and Asian countries cannot be ignored [85,86].

It would be informative to know, what proportion of surgery was performed by colorectal surgical specialists. We failed to give this data because most of our selected publications didn't give the proportion of colorectal surgical specialists except for those involve influencing factors analyzing. But many studies in current literature demonstrated that leak rates were thought to be lower in specialist, rather than general surgical hands. Our previous work also supported this point, which showed that the rate of leak in colorectal surgical specialists group and general surgeons group were 3.9% and 11.3% ( $P=0.031$ ), respectively [14].

The other limitation of this article is the sourcing of the publications. All abstracts were retrieved from Medline, and non-English language papers were excluded in the final analysis. A formal meta-analysis will provide more powerful evidence. The methodology used in the present study was not as powerful as a meta-analysis. However, our systematic

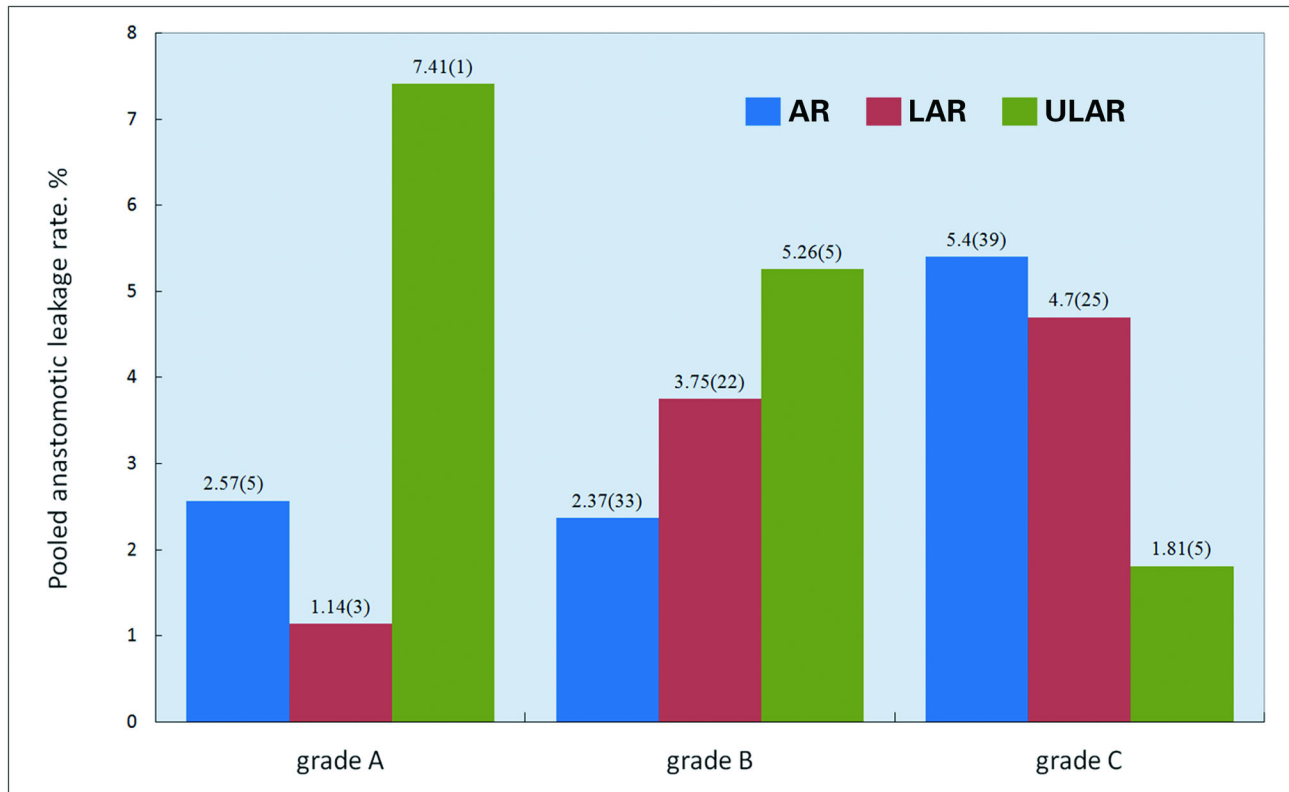

**Figure 6. Pooled AL rates of each grade in AR, LAR, and ULAR (the number of reports are presented in brackets).**

doi: 10.1371/journal.pone.0075519.g006

review provides the summarized data directly from the original publications on the AL rate and on grading.

## Conclusion

We have extracted a significant pooled rate of AL that required relaparotomy following AR for rectal cancer, which was higher than those in LAR and ULAR. The higher rate of protective DS in LAR and ULAR might be the cause of this difference. Compared with past situations when authors used their own definitions and grading in the studies, we now have a generally accepted definition and grading of the severity of AL.

## References

- Den Dulk M, Marijnen CA, Collette L, Putter H, Pählman L et al. (2009) Multicentre analysis of oncological and survival outcomes following anastomotic leakage after rectal cancer surgery. *Br J Surg* 96: 1066-1075. doi:10.1002/bjs.6694. PubMed: 19672927.
- Akagi T, Inomata M, Etoh T, Moriyama H, Yasuda K et al. (2012) Multivariate evaluation of the technical difficulties in performing laparoscopic anterior resection for rectal cancer. *Surg Laparosc Endosc Percutan Tech* 22: 52-57. doi:10.1097/SLE.0b013e31824019fc. PubMed: 22318060.
- Maggiori L, Bretagnol F, Lefèvre JH, Ferron M, Vicaut E et al. (2011) Conservative management is associated with a decreased risk of definitive stoma after anastomotic leakage complicating sphincter-saving resection for rectal cancer. *Colorectal Dis* 13: 632-637. doi: 10.1111/j.1463-1318.2010.02252.x. PubMed: 20236150.
- Rutegård M, Hemmingsson O, Matthiessen P, Rutegård J (2012) High tie in anterior resection for rectal cancer confers no increased risk of anastomotic leakage. *Br J Surg* 99: 127-132. doi:10.1002/bjs.7712. PubMed: 22038493.
- Rahbari NN, Weitz J, Hohenberger W, Heald RJ, Moran B et al. (2010) Definition and grading of anastomotic leakage following anterior resection of the rectum: a proposal by the International Study Group of Rectal Cancer. *Surgery* 147: 339-351. doi:10.1016/j.surg.2009.10.012. PubMed: 20004450.
- Penninckx F, Beirens K, Fieuws S, Ceelen W, Demetter P et al. (2012) Risk adjusted benchmarking of clinical anastomotic leakage rate after total mesorectal excision in the context of an improvement project. *Colorectal Dis* 14: e413-e421. doi:10.1111/j.1463-1318.2012.02977.x. PubMed: 22321047.
- Rondelli F, Balzarotti R, Bugiantella W, Mariani L, Pugliese R et al. (2012) Temporary percutaneous ileostomy versus conventional loop ileostomy in mechanical extraperitoneal colorectal anastomosis: a

This new grading system is simple that ALs of each grade could be easily extracted from past publications. Therefore, this simple classification is likely to be accepted and applied in future studies.

## Author Contributions

Conceived and designed the experiments: MZ EY. Performed the experiments: ZC GY. Analyzed the data: LH MY ZL. Contributed reagents/materials/analysis tools: ZB YG. Wrote the manuscript: ZC ZB.



- retrospective study. *Eur J Surg Oncol* 38: 1065-1070. doi:10.1016/j.ejso.2012.07.110. PubMed: 22951359.
8. Kim SH, Park IJ, Joh YG, Hahn KY (2008) Laparoscopic resection of rectal cancer: a comparison of surgical and oncologic outcomes between extraperitoneal and intraperitoneal disease locations. *Dis Colon Rectum* 51: 844-851. doi:10.1007/s10350-008-9256-x. PubMed: 18330644.
  9. Bretagnol F, Alves A, Ricci A, Valleur P, Panis Y (2007) Rectal cancer surgery without mechanical bowel preparation. *Br J Surg* 94: 1266-1271. doi:10.1002/bjs.5524. PubMed: 17657719.
  10. Bittorf B, Stadelmaier U, Merkel S, Hohenberger W, Matzel KE (2003) Does anastomotic leakage affect functional outcome after rectal resection for cancer? *Langenbecks Arch Surg* 387: 406-410. PubMed: 12607120.
  11. Chamlou R, Parc Y, Simon T, Bennis M, Dehni N et al. (2007) Long-term results of intersphincteric resection for low rectal cancer. *Ann Surg* 246: 916-921. doi:10.1097/SLA.0b013e31815c29ff. PubMed: 18043092.
  12. Ptok H, Marusch F, Meyer F, Schubert D, Gastinger I et al. (2007) Impact of anastomotic leakage on oncological outcome after rectal cancer resection. *Br J Surg* 94: 1548-1554. doi:10.1002/bjs.5707. PubMed: 17668888.
  13. Wong NY, Eu KW (2005) A defunctioning ileostomy does not prevent clinical anastomotic leak after a low anterior resection: a prospective, comparative study. *Dis Colon Rectum* 48: 2076-2079. doi:10.1007/s10350-005-0146-1. PubMed: 16086220.
  14. Cong ZJ, Fu CG, Wang HT, Liu LJ, Zhang W et al. (2009) Influencing factors of symptomatic anastomotic leakage after anterior resection of the rectum for cancer. *World J Surg* 33: 1292-1297. doi:10.1007/s00268-009-0008-4. PubMed: 19363687.
  15. Chen W, Li Y, Liao Z, Lin G, Cai G et al. (2011) Active lymphangiogenesis is a major risk factor for anastomotic leakage following sphincter-sparing resection of rectal cancer. *J Surg Oncol* 104: 493-498. doi:10.1002/jso.21965. PubMed: 21520099.
  16. Xiao L, Zhang WB, Jiang PC, Bu XF, Yan Q et al. (2011) Can transanal tube placement after anterior resection for rectal carcinoma reduce anastomotic leakage rate? A single-institution prospective randomized study. *World J Surg* 35: 1367-1377. doi:10.1007/s00268-011-1053-3. PubMed: 21437746.
  17. Zhao WT, Hu FL, Li YY, Li HJ, Luo WM et al. (2013) Use of a transanal drainage tube for prevention of anastomotic leakage and bleeding after anterior resection for rectal cancer. *World J Surg* 37: 227-232. doi:10.1007/s00268-012-1812-9. PubMed: 23052807.
  18. Law WL, Chu KW, Tung HM (2004) Early outcomes of 100 patients with laparoscopic resection for rectal neoplasm. *Surg Endosc* 18: 1592-1596. doi:10.1007/BF02637126. PubMed: 15931488.
  19. Ito M, Sugito M, Kobayashi A, Nishizawa Y, Tsunoda Y et al. (2008) Relationship between multiple numbers of stapler firings during rectal division and anastomotic leakage after laparoscopic rectal resection. *Int J Colorectal Dis* 23: 703-707. doi:10.1007/s00384-008-0470-8. PubMed: 18379795.
  20. Akiyoshi T, Ueno M, Fukunaga Y, Nagayama S, Fujimoto Y et al. (2011) Incidence of and risk factors for anastomotic leakage after laparoscopic anterior resection with intracorporeal rectal transection and double-stapling technique anastomosis for rectal cancer. *Am J Surg* 202: 259-264. doi:10.1016/j.amjsurg.2010.11.014. PubMed: 21871980.
  21. Yamamoto S, Fujita S, Akasu T, Inada R, Moriya Y et al. (2012) Risk factors for anastomotic leakage after laparoscopic surgery for rectal cancer using a stapling technique. *Surg Laparosc Endosc Percutan Tech* 22: 239-243. doi:10.1097/SLE.0b013e318259f43b. PubMed: 22678320.
  22. Miyajima N, Fukunaga M, Hasegawa H, Tanaka J, Okuda J et al. (2009) Results of a multicenter study of 1,057 cases of rectal cancer treated by laparoscopic surgery. *Surg Endosc* 23: 113-118. doi:10.1007/s00464-008-0078-7. PubMed: 18802736.
  23. Lee MR, Hong CW, Yoon SN, Lim SB, Park KJ et al. (2006) Risk factors for anastomotic leakage after resection for rectal cancer. *Hepato Gastroenterol* 53: 682-686. PubMed: 1928530317086868.
  24. Jung SH, Yu CS, Choi PW, Kim DD, Park IJ et al. (2008) Risk factors and oncologic impact of anastomotic leakage after rectal cancer surgery. *Dis Colon Rectum* 51: 902-908. doi:10.1007/s10350-008-9272-x. PubMed: 18408971.
  25. Kim JS, Cho SY, Min BS, Kim NK (2009) Risk factors for anastomotic leakage after laparoscopic intracorporeal colorectal anastomosis with a double stapling technique. *J Am Coll Surg* 209: 694-701. doi:10.1016/j.jamcollsurg.2009.09.021. PubMed: 19959036.
  26. Joh YG, Kim SH, Hahn KY, Stulberg J, Chung CS et al. (2009) Anastomotic leakage after laparoscopic proctectomy can be managed by a minimally invasive approach. *Dis Colon Rectum* 52: 91-96. doi:10.1007/DCR.0b013e3181973d7f. PubMed: 19273962.
  27. Choi DH, Hwang JK, Ko YT, Jang HJ, Shin HK et al. (2010) Risk factors for anastomotic leakage after laparoscopic rectal resection. *J Korean Soc Coloproctol* 26: 265-273. doi:10.3393/jksc.2010.26.4.265. PubMed: 21152228.
  28. Shin US, Kim CW, Yu CS, Kim JC (2010) Delayed anastomotic leakage following sphincter-preserving surgery for rectal cancer. *Int J Colorectal Dis* 25: 843-849. doi:10.1007/s00384-010-0938-1. PubMed: 20387070.
  29. Huh JW, Kim HR, Kim YJ (2010) Anastomotic leakage after laparoscopic resection of rectal cancer: the impact of fibrin glue. *Am J Surg* 199: 435-441. doi:10.1016/j.amjsurg.2009.01.018. PubMed: 19481197.
  30. Lin JK, Yueh TC, Chang SC, Lin CC, Lan YT et al. (2011) The influence of fecal diversion and anastomotic leakage on survival after resection of rectal cancer. *J Gastrointest Surg* 15: 2251-2261. doi:10.1007/s11605-011-1721-5. PubMed: 22002413.
  31. Tocchi A, Mazzoni G, Lepre L, Costa G, Liotta G et al. (2000) Prospective evaluation of omentoplasty in preventing leakage of colorectal anastomosis. *Dis Colon Rectum* 43: 951-955. doi:10.1007/BF02237357. PubMed: 10910241.
  32. Scheidbach H, Schneider C, Rose J, Konradt J, Gross E et al. (2002) Laparoscopic abdominoperineal resection and anterior resection with curative intent for carcinoma of the rectum. *Surg Endosc* 16: 7-13. doi:10.1007/s00464-001-8314-4. PubMed: 11961595.
  33. Schmidt O, Merkel S, Hohenberger W (2003) Anastomotic leakage after low rectal stapler anastomosis: significance of intraoperative anastomotic testing. *Eur J Surg Oncol* 29: 239-243. doi:10.1053/ejso.2002.1416. PubMed: 12657233.
  34. Matthiessen P, Hallböök O, Andersson M, Rutegård J, Sjö Dahl R (2004) Risk factors for anastomotic leakage after anterior resection of the rectum. *Colorectal Dis* 6: 462-469. doi:10.1111/j.1463-1318.2004.00657.x. PubMed: 15521937.
  35. Kanellos I, Vasiladiadis K, Angelopoulos S, Tsachalis T, Pramateftakis MG et al. (2004) Anastomotic leakage following anterior resection for rectal cancer. *Tech Coloproctol* 8 Suppl 1: s79-s81. doi:10.1007/s10151-004-0119-8. PubMed: 15655652.
  36. Gastinger I, Marusch F, Steinert R, Wolff S, Koeckerling F et al. (2005) Protective defunctioning stoma in low anterior resection for rectal carcinoma. *Br J Surg* 92: 1137-1142. doi:10.1002/bjs.5045. PubMed: 15997447.
  37. Vlot EA, Zeebregts CJ, Gerritsen JJ, Mulder HJ, Mastboom WJ et al. (2005) Anterior resection of rectal cancer without bowel preparation and diverting stoma. *Surg Today* 35: 629-633. doi:10.1007/s00595-005-2999-2. PubMed: 16034541.
  38. Eriksen MT, Wibe A, Norstein J, Haffner J, Wiig JN (2005) Anastomotic leakage following routine mesorectal excision for rectal cancer in a national cohort of patients. *Colorectal Dis* 7: 51-57. doi:10.1111/j.1463-1318.2004.00700.x. PubMed: 15606585.
  39. Nesbakken A, Nygaard K, Lunde OC, Blücher J, Gjertsen Ø et al. (2005) Anastomotic leak following mesorectal excision for rectal cancer: true incidence and diagnostic challenges. *Colorectal Dis* 7: 576-581. doi:10.1111/j.1463-1318.2005.00870.x. PubMed: 16232238.
  40. Bianchi PP, Rosati R, Bona S, Rottoli M, Elmore U et al. (2007) Laparoscopic surgery in rectal cancer: a prospective analysis of patient survival and outcomes. *Dis Colon Rectum* 50: 2047-2053. doi:10.1007/s10350-007-9055-9. PubMed: 17906896.
  41. Kruschewski M, Rieger H, Pohlen U, Hotz HG, Buhr HJ (2007) Risk factors for clinical anastomotic leakage and postoperative mortality in elective surgery for rectal cancer. *Int J Colorectal Dis* 22: 919-927. doi:10.1007/s00384-006-0260-0. PubMed: 17260142.
  42. Brennan DJ, Moynagh M, Brannigan AE, Gleeson F, Rowland M et al. (2007) Routine mobilization of the splenic flexure is not necessary during anterior resection for rectal cancer. *Dis Colon Rectum* 50: 302-307. doi:10.1007/10350-006-0811-z. PubMed: 17211537.
  43. Matthiessen P, Hallböök O, Rutegård J, Simert G, Sjö Dahl R (2007) Defunctioning stoma reduces symptomatic anastomotic leakage after low anterior resection of the rectum for cancer: a randomized multicenter trial. *Ann Surg* 246: 207-214. doi:10.1097/SLA.0b013e3180603024. PubMed: 17667498.
  44. Eberl T, Jagoditsch M, Klingler A, Tschmelitsch J (2008) Risk factors for anastomotic leakage after resection for rectal cancer. *Am J Surg* 196: 592-598. doi:10.1016/j.amjsurg.2007.10.023. PubMed: 18571620.
  45. Bretagnol F, Panis Y, Rullier E, Rouanet P, Berdah S et al. (2010) Rectal cancer surgery with or without bowel preparation: The French GRECCAR III multicenter single-blinded randomized trial. *Ann Surg* 252: 863-868. doi:10.1097/SLA.0b013e3181fd8ea9. PubMed: 21037443.

46. Mroczkowski P, Hać S, Mik M, Berut M, Dziki Ł et al. (2011) Preliminary results of the first quality assurance project in rectal cancer in Poland. *Pol Przegl Chir* 83: 144-149. PubMed: 22166316.
47. Warschkow R, Steffen T, Thierbach J, Bruckner T, Lange J et al. (2011) Risk factors for anastomotic leakage after rectal cancer resection and reconstruction with colectostomy. A retrospective study with bootstrap analysis. *Ann Surg Oncol* 18: 2772-2782. doi:10.1245/s10434-011-1696-1. PubMed: 21468782.
48. Peeters KC, Tollenaar RA, Marijnen CA, Klein Kranenbarg E, Steup WH et al. (2005) Risk factors for anastomotic failure after total mesorectal excision of rectal cancer. *Br J Surg* 92: 211-216. doi: 10.1002/bjs.4806. PubMed: 15584062.
49. Smith JD, Paty PB, Guillem JG, Temple LK, Weiser MR et al. (2012) Anastomotic leak is not associated with oncologic outcome in patients undergoing low anterior resection for rectal cancer. *Ann Surg* 256: 1034-1038. doi:10.1097/SLA.0b013e318257d2c1. PubMed: 22584695.
50. Law WJ, Chu KW, Ho JW, Chan CW (2000) Risk factors for anastomotic leakage after low anterior resection with total mesorectal excision. *Am J Surg* 179: 92-96. doi:10.1016/S0002-9610(00)00252-X. PubMed: 10773140.
51. Leester B, Asztalos I, Polnyib C (2002) Septic complications after low anterior rectal resection--is diverting stoma still justified? *Acta Chir Iugosl* 49: 67-71. doi:10.2298/ACI0202067L. PubMed: 12587473.
52. Marusch F, Koch A, Schmidt U, Geibetaler S, Dralle H et al. (2002) Value of a protective stoma in low anterior resections for rectal cancer. *Dis Colon Rectum* 45: 1164-1171. doi:10.1007/s10350-004-6384-9. PubMed: 12352230.
53. Eckmann C, Kujath P, Schiedeck TH, Shekarriz H, Bruch HP (2004) Anastomotic leakage following low anterior resection: results of a standardized diagnostic and therapeutic approach. *Int J Colorectal Dis* 19: 128-133. doi:10.1007/s00384-003-0498-8. PubMed: 14752675.
54. el-Sa Khalil, El-Zohairy M, El-Shahawy M (2004) Sphincter sparing procedures: is it a standard for management of low rectal cancer. *J Egypt Natl Cancer Inst* 16: 210-215.
55. Ulrich AB, Seiler C, Rahbari N, Weitz J, Büchler MW (2009) Diverting stoma after low anterior resection: more arguments in favor. *Dis Colon Rectum* 52: 412-418. doi:10.1007/DCR.0b013e318197e1b1. PubMed: 19333040.
56. Peng J, Lu J, Xu Y, Guan Z, Wang M et al. (2010) Standardized pelvic drainage of anastomotic leaks following anterior resection without diversionary stomas. *Am J Surg* 199: 753-758. doi:10.1016/j.amjsurg.2009.03.026. PubMed: 19837397.
57. Biondo S, Frago R, Codina Cazador A, Farres R, Olivet F et al. (2013) Long-term functional results from a randomized clinical study of transverse coloplasty compared with colon J-pouch after low anterior resection for rectal cancer. *Surgery* 153: 383-392. doi:10.1016/j.surg.2012.08.012. PubMed: 22981362.
58. Bennis M, Parc Y, Lefevre JH, Chafai N, Attal E et al. (2012) Morbidity risk factors after low anterior resection with total mesorectal excision and coloanal anastomosis: a retrospective series of 483 patients. *Ann Surg* 255: 504-510. doi:10.1097/SLA.0b013e31824485c4. PubMed: 22281734.
59. Fujita S, Akasu T, Mizusawa J, Saito N, Kinugasa Y et al. (2012) Postoperative morbidity and mortality after mesorectal excision with and without lateral lymph node dissection for clinical stage II or stage III lower rectal cancer (JCOG0212): results from a multicentre, randomised controlled, non-inferiority trial. *Lancet Oncol* 13: 616-621. doi:10.1016/S1470-2045(12)70158-4. PubMed: 22591948.
60. Kanellos I, Zacharakis E, Christoforidis E, Demetriades H, Betsis D (2002) Low anterior resection without defunctioning stoma. *Tech Coloproctol* 6: 153-156. doi:10.1007/s101510200035. PubMed: 12525908.
61. Lefebvre B, Tuech JJ, Bridoux V, Costaglioli B, Scotte M et al. (2008) Evaluation of selective defunctioning stoma after low anterior resection for rectal cancer. *Int J Colorectal Dis* 23: 283-288. doi:10.1007/s00384-007-0380-1. PubMed: 17768630.
62. Ferenschild FT, Dawson I, de Wilt JH, de Graaf EJ, Groenendijk RP et al. (2009) Total mesorectal excision for rectal cancer in an unselected population: quality assessment in a low volume center. *Int J Colorectal Dis* 24: 923-929. doi:10.1007/s00384-009-0732-0. PubMed: 19488771.
63. Fukunaga Y, Higashino M, Tanimura S, Takemura M, Fujiwara Y (2010) Laparoscopic rectal surgery for middle and lower rectal cancer. *Surg Endosc* 24: 145-151. doi:10.1007/s00464-009-0551-y. PubMed: 19517172.
64. Glancy DG, Chaudhry BN, Greenslade GL, Dixon AR (2012) Laparoscopic total mesorectal excision can be performed on a nonselective basis in patients with rectal cancer with excellent medium-term results. *Colorectal Dis* 14: 453-457. doi:10.1111/j.1463-1318.2011.02682.x. PubMed: 21689350.
65. Kruschewski M, Gröne J, Vogel N, Zimmermann M, Buhr HJ (2011) Management and results of complications after anterior resection with colonic pouch reconstruction for rectal cancer. *Colorectal Dis* 13: 284-289. doi:10.1111/j.1463-1318.2009.02140.x. PubMed: 19925491.
66. Shiomi A, Ito M, Saito N, Ohue M, Hirai T et al. (2011) Diverting stoma in rectal cancer surgery. A retrospective study of 329 patients from Japanese cancer centers. *Int J Colorectal Dis* 26: 79-87. doi:10.1007/s00384-010-1036-0. PubMed: 20686775.
67. Ogiso S, Yamaguchi T, Hata H, Kuroyanagi H, Sakai Y (2010) Introduction of laparoscopic low anterior resection for rectal cancer early during residency: a single institutional study on short-term outcomes. *Surg Endosc* 24: 2822-2829. doi:10.1007/s00464-010-1057-3. PubMed: 20422431.
68. Nesbakken A, Nygaard K, Lunde OC (2001) Outcome and late functional results after anastomotic leakage following mesorectal excision for rectal cancer. *Br J Surg* 88: 400-404. doi:10.1046/j.1365-2168.2001.01719.x. PubMed: 11260107.
69. Kanellos D, Pramateftakis MG, Vrakas G, Demetriades H, Kanellos I et al. (2010) Anastomotic leakage following low anterior resection for rectal cancer. *Tech Coloproctol* 14 Suppl 1: S35-S37. doi:10.1007/s10151-010-0620-1. PubMed: 20694497.
70. Zhu QL, Feng B, Lu AG, Wang ML, Hu WG et al. (2010) Laparoscopic low anterior resection for rectal carcinoma: complications and management in 132 consecutive patients. *World J Gastroenterol* 16: 4605-4610. doi:10.3748/wjg.v16.i36.4605. PubMed: 20857534.
71. Fouda E, El Nakeeb A, Magdy A, Hammad EA, Othman G et al. (2011) Early detection of anastomotic leakage after elective low anterior resection. *J Gastrointest Surg* 15: 137-144. doi:10.1007/s11605-010-1364-y. PubMed: 20978948.
72. Z'graggen K, Maurer CA, Birrer S, Giachino D, Kern B et al. (2001) A new surgical concept for rectal replacement after low anterior resection: the transverse coloplasty pouch. *Ann Surg* 234: 780-785. doi: 10.1097/0000658-200112000-00009. PubMed: 11729384.
73. Ho YH, Brown S, Heah SM, Tsang C, Seow-Choen F et al. (2002) Comparison of J-pouch and coloplasty pouch for low rectal cancers: a randomized, controlled trial investigating functional results and comparative anastomotic leak rates. *Ann Surg* 236: 49-55. doi: 10.1097/0000658-200207000-00009. PubMed: 12131085.
74. Vorobiev GI, Odaryuk TS, Tsarkov PV, Talalakin AI, Rybakov EG (2004) Resection of the rectum and total excision of the internal anal sphincter with smooth muscle plasty and colonic pouch for treatment of ultralow rectal carcinoma. *Br J Surg* 91: 1506-1512. doi:10.1002/bjs.4330. PubMed: 15455363.
75. Chude GG, Rayate NV, Patris V, Koshariya M, Jagad R et al. (2008) Defunctioning loop ileostomy with low anterior resection for distal rectal cancer: should we make an ileostomy as a routine procedure? A prospective randomized study. *Hepatogastroenterology* 55: 1562-1567. PubMed: 19102343.
76. Akasu T, Takawa M, Yamamoto S, Yamaguchi T, Fujita S et al. (2010) Risk factors for anastomotic leakage following intersphincteric resection for very low rectal adenocarcinoma. *J Gastrointest Surg* 14: 104-111. doi:10.1007/s11605-009-1067-4. PubMed: 19841989.
77. Liu HB, Han XP, Zhu WK, Su L, Zhang XK (2011) Clinical importance of surgical treatment of low rectal carcinoma in anus-preserving procedure--an analysis of 86 cases. *Int Surg* 96: 13-17. doi: 10.9738/1351.1. PubMed: 21675614.
78. Gong H, Yu Y, Yao Y (2013) Clinical Value of Preventive Ileostomy Following Ultra-Low Anterior Rectal Resection. *Cell Biochem Biophys* 65: 491-493. doi:10.1007/s12013-012-9445-z. PubMed: 23076636.
79. Hallböök O, Sjö Dahl R (1996) Anastomotic leakage and functional outcome after anterior resection of the rectum. *Br J Surg* 83: 60-62. doi: 10.1002/bjs.1800830119. PubMed: 8653367.
80. Bell SW, Walker KG, Rickard MJ, Sinclair G, Dent OF et al. (2003) Anastomotic leakage after curative anterior resection results in a higher prevalence of local recurrence. *Br J Surg* 90: 1261-1266. doi:10.1002/bjs.4219. PubMed: 14515297.
81. Merkel S, Wang WY, Schmidt O, Dworak O, Wittekind C et al. (2001) Locoregional recurrence in patients with anastomotic leakage after anterior resection for rectal carcinoma. *Colorectal Dis* 3: 154-160. doi: 10.1046/j.1463-1318.2001.00232.x. PubMed: 12790981.
82. Goligher JC, Lee PW, Simpkins KC, Lintott DJ (1977) A controlled comparison one- and two-layer techniques of suture for high and low colorectal anastomoses. *Br J Surg* 64: 609-614. doi:10.1002/bjs.1800640902. PubMed: 338092.
83. Beirens K, Penninckx F, PROCARE (2012) Defunctioning stoma and anastomotic leak rate after total mesorectal excision with coloanal anastomosis in the context of PROCARE. *Acta Chir Belg* 112: 10-14. PubMed: 22442904.

84. Dehni N, Schlegel RD, Cunningham C, Guiguet M, Tired E et al. (1998) Influence of a defunctioning stoma on leakage rates after low colorectal anastomosis and colonic J pouch-anal anastomosis. *Br J Surg* 85: 1114-1117. doi:10.1046/j.1365-2168.1998.00790.x. PubMed: 9718009.
85. Watanabe T, Itabashi M, Shimada Y, Tanaka S, Ito Y et al. (2012) Japanese Society for Cancer of the Colon and Rectum (JSCCR) Guidelines 2010 for the treatment of colorectal cancer *Int J Clin Oncol* 17: 1-29
86. Tsujinaka S, Kawamura YJ, Konishi F, Aihara H, Maeda T et al. (2008) Long-term efficacy of preoperative radiotherapy for locally advanced low rectal cancer. *Int J Colorectal Dis* 23: 67-76. PubMed: 17704925.
